# Supplementary material for: Haze types in Beijing and the influence of agricultural biomass burning
Source: Copernicus journal article supplement (doi:10.5194/acp-10-8119-2010), 2010-09-01
Supplement: Supplementary file [file acp-10-8119-2010-supplement.pdf]

## Supplements

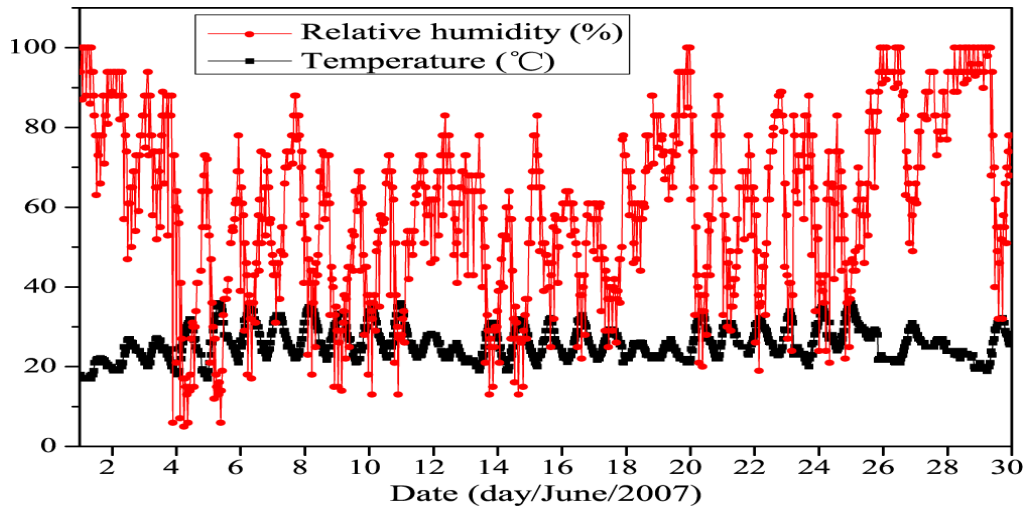

Figure S1 Variation of relative humidity (RH) and temperature along with the time series during June 2007. The data points represent averaged hourly means. Maximum RH values (80-100%) occurred during nighttime and morning, and minimum values (10-80%) during noontime at each day. All the data was obtained from <http://www.wunderground.com>.
